# Supplementary material for: Changes in diversity and community assembly of jumping spiders (Araneae: Salticidae) after rainforest conversion to rubber and oil palm plantations
Source: PeerJ journal article supplement (doi:10.7717/peerj.11012), 2021-03-04

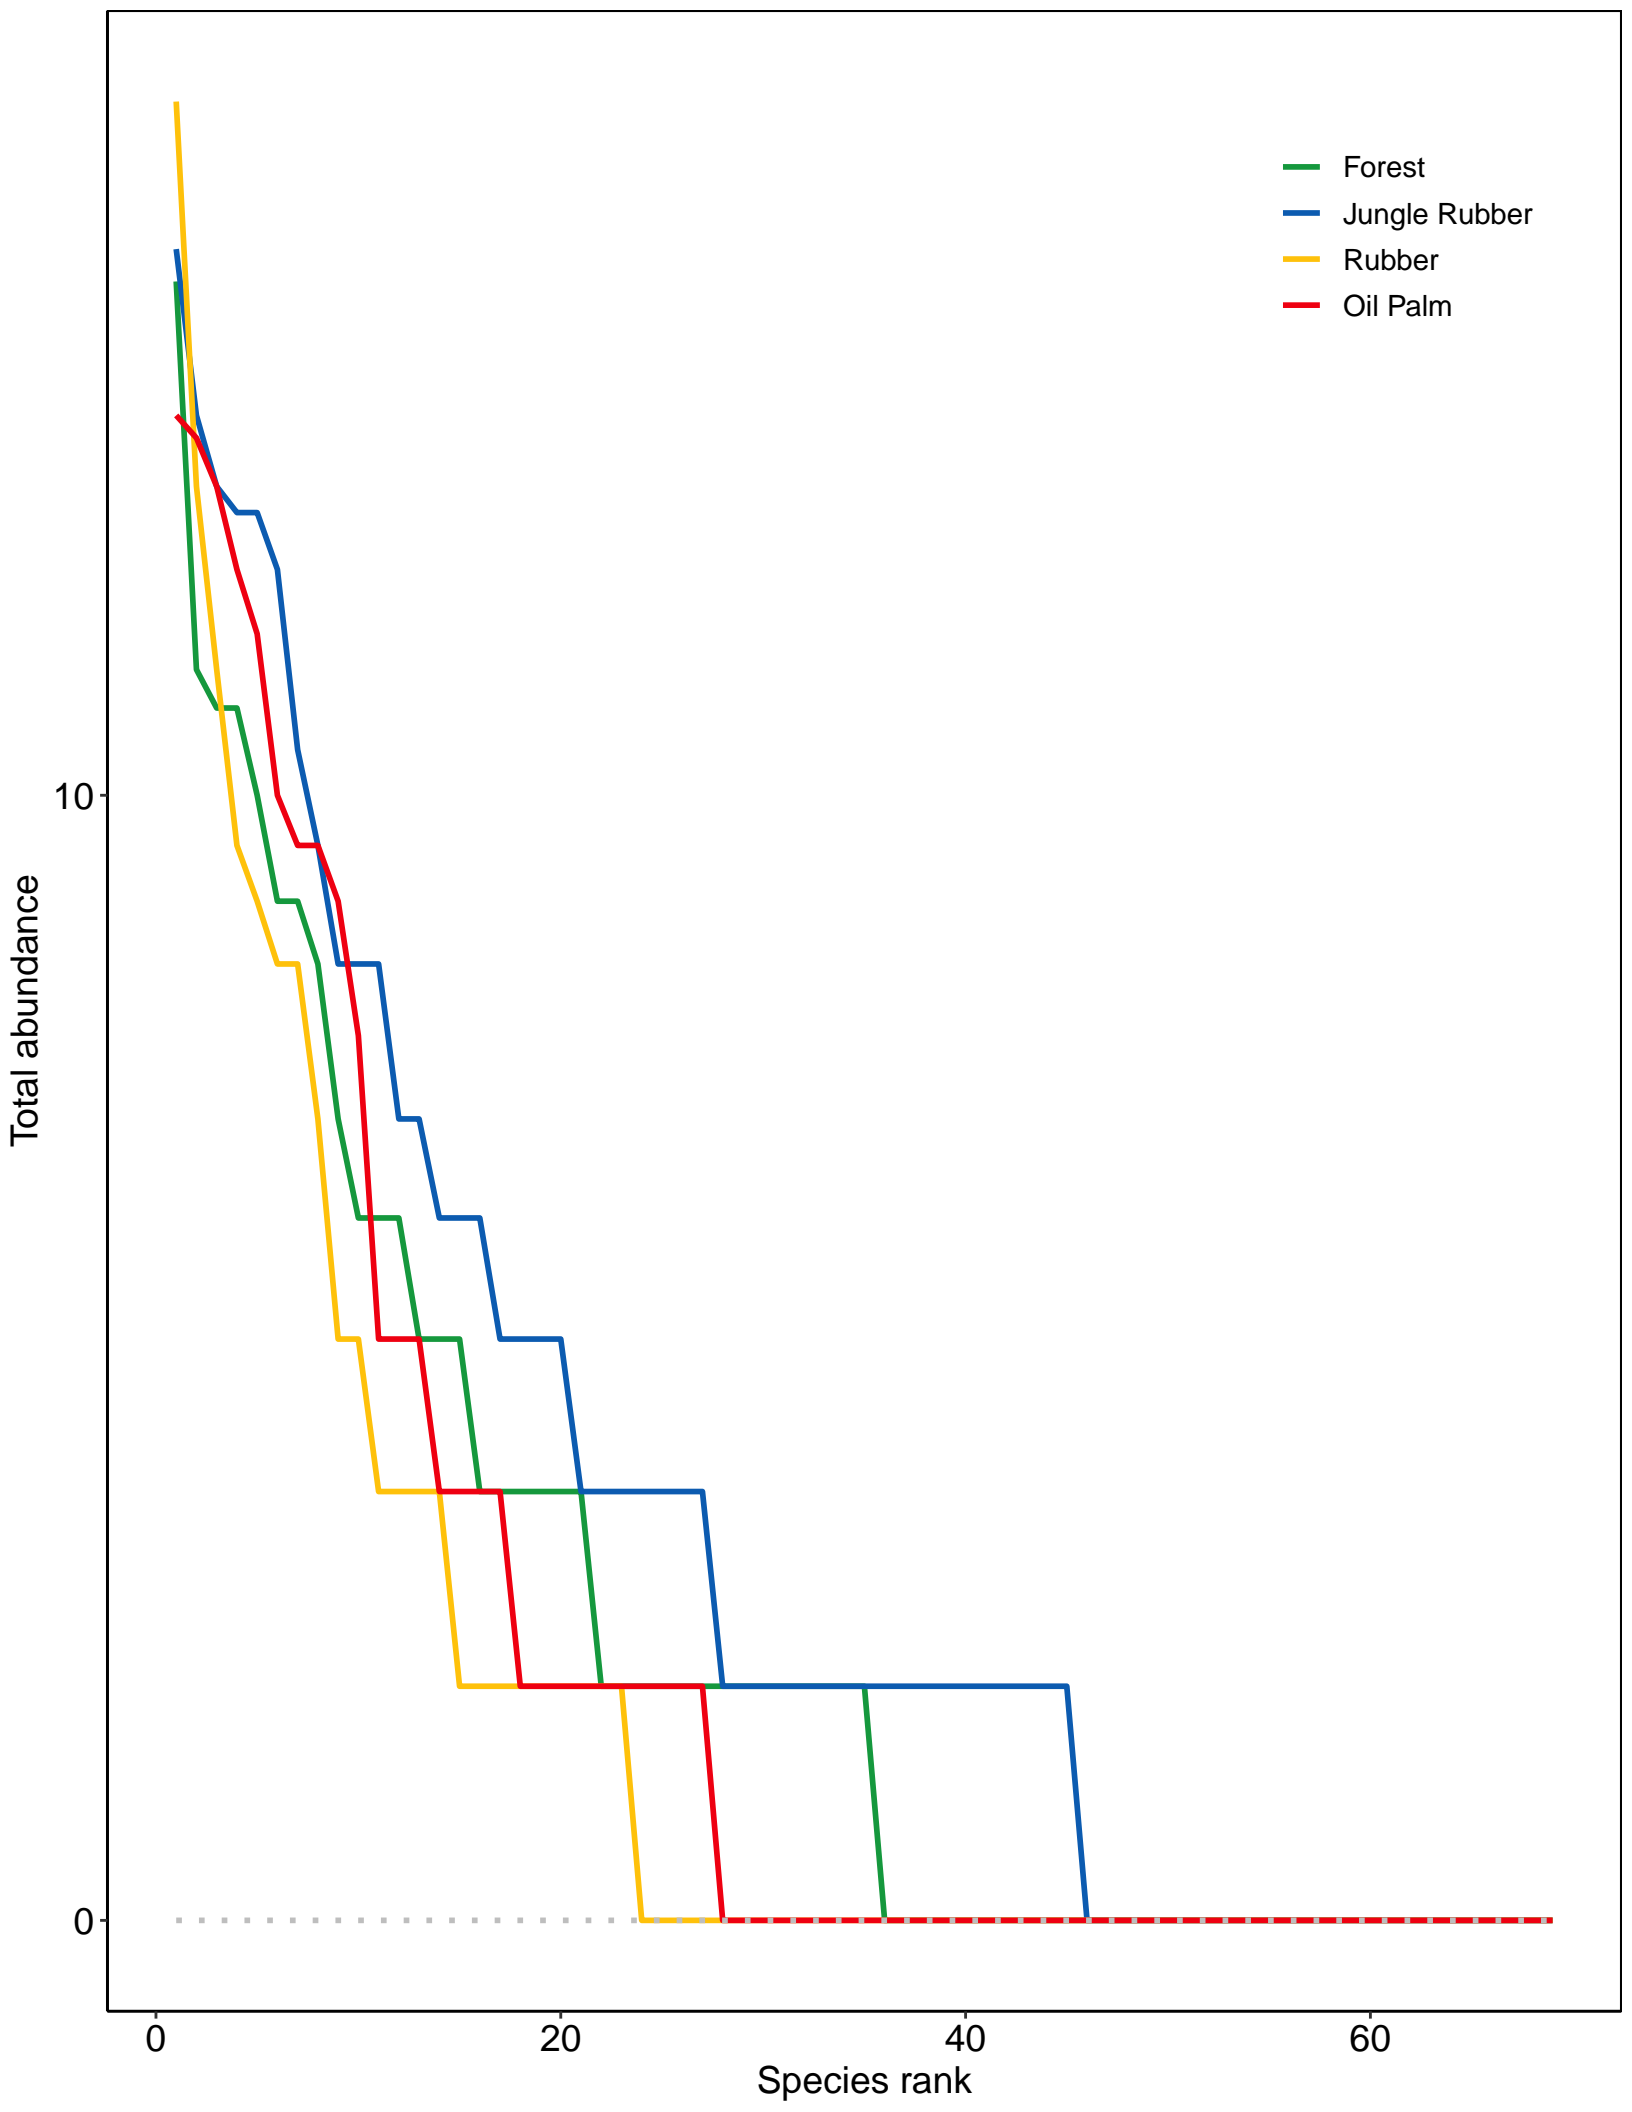

Supplement: Figure_S7.pdf [file Figure_S7.pdf]
